# Supplementary material for: Application of Serological Tools and Spatial Analysis to Investigate Malaria Transmission Dynamics in Highland Areas of Southwest Uganda
Source: PubMed Central journal article supplement (PMC4889741; doi:10.4269/ajtmh.15-0653), 2016-06-01
Supplement: SD2.pdf [file SD2.pdf]

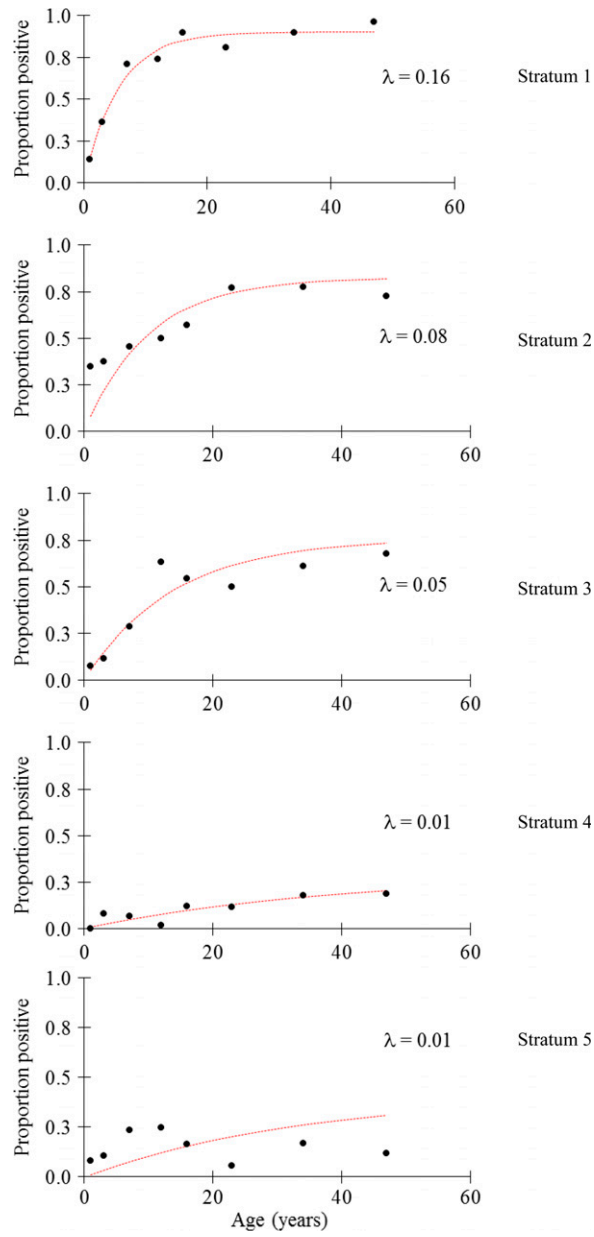

SUPPLEMENTAL FIGURE 1. Seroprevalance curves for *Plasmodium falciparum* merozoite surface protein-1<sub>19</sub> (MSP-1<sub>19</sub>) antigens for each stratum, Uganda.
